# Supplementary material for: Isomorphism combined with intercalation methods to construct a hybrid electrode material for high-energy storage capacitors
Source: Royal Society of Chemistry journal article supplement (doi:10.1039/c9ta08696j), 2019-01-01
Supplement: c9ta08696j1.pdf [file c9ta08696j1.pdf]

# Isomorphism combined with intercalation methods to construct hybrid electrode material for high-energy storage capacitor

Taotao Sun<sup>§a</sup>, Liguo Yue <sup>§a</sup>, Ning Wu <sup>a</sup>, Mengni Xu <sup>a</sup>, Wenhui Yang <sup>a</sup>, Hao Guo<sup>ab\*</sup>, Wu Yang<sup>a\*</sup>

<sup>a</sup> Key Lab of Bioelectrochemistry and Environmental Analysis of Gansu Province, Key Lab of Eco-Environments Related Polymer Materials of MOE, College of Chemistry and Chemical Engineering, Northwest Normal University, Lanzhou 730070, P R China.

<sup>b</sup>Gansu International Scientific and Technological Cooperation Base of Water-Retention Chemical Functional Materials, Lanzhou 730070, P R China.

<sup>§</sup>These two authors contributed equally to this work.

\*Corresponding author. E-mail address: xbsfda123@126.com (W. Yang); haoguo12@126.com (H. Guo)

## 1. Electrochemical characterization and test

Three-electrode equipment: the electrochemical studies of PM and PZM were first carried out in 3.0 M KOH electrolyte solution. The electrochemical performances were measured with an electrochemical workstation (CHI 660E). Cyclic voltammetry (CV) tests were done between -0.2 and 0.6 V for electrodes at scan rates of 10, 20, 30, 40, and 50 mV·s<sup>-1</sup>. Following procedures is the preparing of working electrodes: the synthesized active material (PM and PZM), carbon black and PTFE were mixed homogeneously with ethanol by sonication (a mass ratio of 80:15:5). Then the mixture was coated on nickel foams (1×1 cm<sup>2</sup>). After dried at 55°C in vacuum for 12 h, the nickel foams were pressed under 15 MPa for 20 s. The loading mass of the active materials was measured. Galvanostatic charge-discharge (GCD) was employed to examine the specific capacitance of the electrode. According to the following equation, the single electrode capacitance was calculated from the GCD curves. And the Electrochemical Impedance Spectroscopy (EIS) measurements were carried out in

the different frequency.

$$C_s = \frac{I\Delta t}{m\Delta V} \quad (1)$$

The two-electrode asymmetric supercapacitor (ASC) of PZM//AC was built in 3.0 M KOH electrolyte. The mass of active sample: acetylene black: PTFE binder=80:15:5. In addition, Nickel foam (1×1 cm<sup>2</sup>) served as the current collector. Specific capacitances derived from galvanostatic tests can be calculated from the equation:

$$SE = \frac{C\Delta V^2}{7.2} \quad (2)$$

$$SP = \frac{3600 * SE}{\Delta t} \quad (3)$$

The  $C_s$ ,  $I$ ,  $m$ ,  $\Delta t$  and  $\Delta V$  refer to the specific capacitance (F·g<sup>-1</sup>), current density (A), charge-discharge time(s), mass of active materials (g) and potential (V), respectively. The  $SE$  and  $SP$  refer to the specific energy density (Wh·kg<sup>-1</sup>) and specific power density (W·kg<sup>-1</sup>).

## 2. Figure

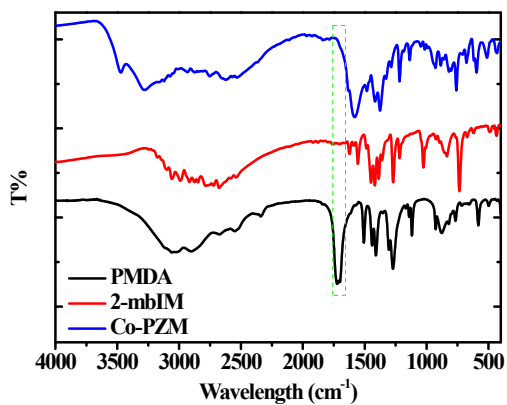

Figure S1 Infrared spectrum of PMDA, 2-mbIM and Co-PZM.

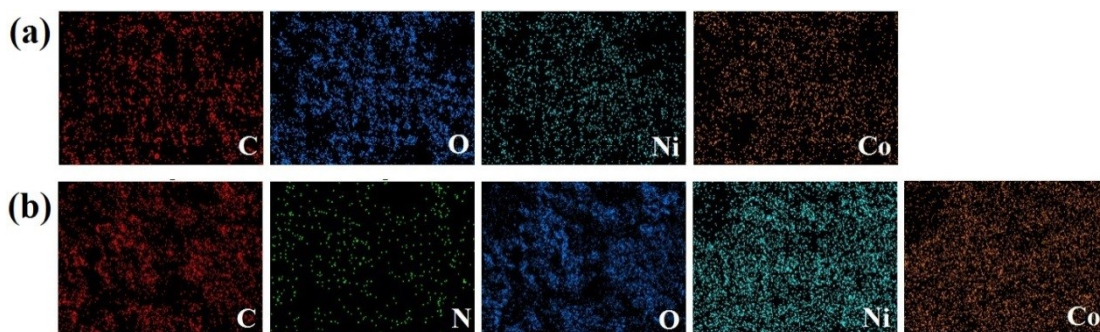

Figure S2 EDS mapping of (a) PM, (b) PZM.

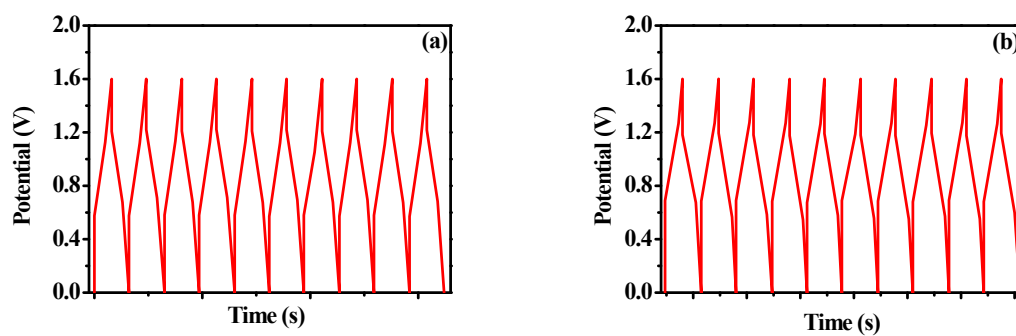

Figure S3 GCD curves of PZM//AC ASC at a current density of  $10 \text{ A}\cdot\text{g}^{-1}$ : (a) the first ten cycles, (b) the last ten cycles.

### 3. Table

**Table S1** Phase Data and Atomic Parameters for Co-PZM;

| Phase data        |                                                                                                                                     |      |              |             |             |                     |
|-------------------|-------------------------------------------------------------------------------------------------------------------------------------|------|--------------|-------------|-------------|---------------------|
| Space-group       | P-1 (2) - triclinic                                                                                                                 |      |              |             |             |                     |
| Cell              | a=7.0903(8) Å; b=9.6953(11) Å; c=10.7313(12) Å;<br>α=93.062(3)°; β=104.142(3)°; γ=107.964(3)°;<br>V=673.80(13) Å <sup>3</sup> ; Z=1 |      |              |             |             |                     |
| Atomic parameters |                                                                                                                                     |      |              |             |             |                     |
| Atom              | Wyck.                                                                                                                               | Site | x/a          | y/b         | z/c         | U [Å <sup>2</sup> ] |
| C1                | 2i                                                                                                                                  | 1    | 0.3630(2)    | 1.03048(14) | 0.71223(12) |                     |
| C3                | 2i                                                                                                                                  | 1    | 0.1730(2)    | 1.01379(14) | 0.60321(12) |                     |
| C4                | 2i                                                                                                                                  | 1    | 0.1894(2)    | 1.02188(15) | 0.47635(13) |                     |
| H4                | 2i                                                                                                                                  | 1    | 0.32049      | 1.0361      | 0.46268     | 0.022               |
| C5                | 2i                                                                                                                                  | 1    | -0.0191(2)   | 0.99142(14) | 0.62608(12) |                     |
| C9                | 2i                                                                                                                                  | 1    | -0.0486(2)   | 0.98837(16) | 0.76105(12) |                     |
| C10               | 2i                                                                                                                                  | 1    | 0.2705(3)    | 0.5135(3)   | 0.1511(2)   |                     |
| H10D              | 2i                                                                                                                                  | 1    | 0.13223      | 0.49181     | 0.09745     | 0.075               |
| H10E              | 2i                                                                                                                                  | 1    | 0.32448      | 0.43903     | 0.12868     | 0.075               |
| H10F              | 2i                                                                                                                                  | 1    | 0.35524      | 0.60683     | 0.13772     | 0.075               |
| C11               | 2i                                                                                                                                  | 1    | 0.2700(3)    | 0.51764(19) | 0.28915(18) |                     |
| C12               | 2i                                                                                                                                  | 1    | 0.2216(2)    | 0.44658(17) | 0.47468(16) |                     |
| C13               | 2i                                                                                                                                  | 1    | 0.1696(3)    | 0.37110(18) | 0.57387(17) |                     |
| H13               | 2i                                                                                                                                  | 1    | 0.11375      | 0.26948     | 0.56176     | 0.04                |
| C14               | 2i                                                                                                                                  | 1    | 0.2041(3)    | 0.4528(2)   | 0.69156(18) |                     |
| H14               | 2i                                                                                                                                  | 1    | 0.17053      | 0.40521     | 0.76012     | 0.045               |
| C15               | 2i                                                                                                                                  | 1    | 0.2887(3)    | 0.6059(2)   | 0.70991(19) |                     |
| H15               | 2i                                                                                                                                  | 1    | 0.31117      | 0.65782     | 0.7906      | 0.048               |
| C16               | 2i                                                                                                                                  | 1    | 0.3390(3)    | 0.68081(19) | 0.61115(19) |                     |
| H16               | 2i                                                                                                                                  | 1    | 0.39544      | 0.7824      | 0.62337     | 0.046               |
| C17               | 2i                                                                                                                                  | 1    | 0.3021(2)    | 0.59883(17) | 0.49232(17) |                     |
| Co1               | 1d                                                                                                                                  | -1   | 1/2          | 1           | 1           |                     |
| N1                | 2i                                                                                                                                  | 1    | 0.3289(2)    | 0.63806(16) | 0.37426(16) |                     |
| H1                | 2i                                                                                                                                  | 1    | 0.37606      | 0.72628     | 0.35833     | 0.043               |
| N2                | 2i                                                                                                                                  | 1    | 0.2061(2)    | 0.40079(15) | 0.34697(14) |                     |
| H2                | 2i                                                                                                                                  | 1    | 0.16215      | 0.31122     | 0.31086     | 0.038               |
| O1                | 2i                                                                                                                                  | 1    | 0.33012(15)  | 0.97073(12) | 0.80956(9)  |                     |
| O2                | 2i                                                                                                                                  | 1    | 0.53569(16)  | 1.09672(13) | 0.69844(11) |                     |
| O3                | 2i                                                                                                                                  | 1    | -0.13591(18) | 0.86448(12) | 0.78957(10) |                     |

---

|      |      |   |             |             |             |       |
|------|------|---|-------------|-------------|-------------|-------|
| O4   | $2i$ | 1 | 0.00775(16) | 1.10772(12) | 0.83141(9)  |       |
| O9   | $2i$ | 1 | 0.63803(16) | 0.84112(11) | 0.96793(9)  |       |
| H9   | $2i$ | 1 | 0.73444     | 0.84854     | 1.03132     | 0.037 |
| H12  | $2i$ | 1 | 0.68846     | 0.85765     | 0.90604     | 0.037 |
| O10  | $2i$ | 1 | 0.22512(17) | 0.83497(12) | 1.01171(11) |       |
| H10B | $2i$ | 1 | 0.11259     | 0.83192     | 0.93928     | 0.045 |
| H10C | $2i$ | 1 | 0.19447     | 0.85783     | 1.09107     | 0.045 |

---

**Table S2** Summary report: the surface area, pore volume and median pore width of PZM and PM;

|                 | Summary Report        | PZM | PM   |
|-----------------|-----------------------|-----|------|
| Surface Area    | BET Surface Area      | 145 | 39   |
|                 | Langmuir Surface Area | 209 | 56   |
| Horvath-Kawazoe | Median pore width     | 12Å | 13 Å |
